# Supplementary material for: How to actively learn chemical reaction yields in real-time using stopping criteria
Source: Royal Society of Chemistry journal article supplement (doi:10.1039/d3re00628j), 2024-01-01
Supplement: d3re00628j1.pdf [file d3re00628j1.pdf]

# Supporting Information - How to actively learn chemical reactions yields in real-time using stopping criteria

Vincent Delmas,<sup>\*a</sup> Denis Jacquemin,<sup>ab</sup> Aymeric Blondel,<sup>a</sup> Morgane Vacher,<sup>a</sup>  
and Adèle D. Laurent<sup>\*a 1</sup>

<sup>a</sup> Nantes Université, CNRS, CEISAM, UMR 6230, F-44000, Nantes, France.

<sup>b</sup> Institut Universitaire de France (IUF), Paris, 75005, France.

## Contents

|          |                                                                           |          |
|----------|---------------------------------------------------------------------------|----------|
| <b>1</b> | <b>Source code and datasets</b>                                           | <b>2</b> |
| <b>2</b> | <b>Data computed for the S-M dataset</b>                                  | <b>2</b> |
| <b>3</b> | <b>Reduced 2D descriptors from RDKit</b>                                  | <b>3</b> |
| <b>4</b> | <b>Global Scores for One-hot encoder and Reduced RDKit 2D descriptors</b> | <b>6</b> |
| <b>5</b> | <b>Simplified AL loop algorithm</b>                                       | <b>7</b> |

## 1 Source code and datasets

The source code to compute the different SP scores as well as the datasets used in this work can be found here: [https://gitlab.univ-nantes.fr/modes/public/sp\\_score](https://gitlab.univ-nantes.fr/modes/public/sp_score). The datasets can also be found in the Open Reaction Database (ORD) here: <https://open-reaction-database.org> or on their GitHub: <https://github.com/open-reaction-database/ord-data>.

## 2 Data computed for the S-M dataset

In Table S1 are computed all the data for the S-M dataset, using different QPI (10 and 50), stop set size (15% and 30%) and descriptors with an SP score  $\geq 0.99$ . For the supervised ML part (column on the right of Table S1), the F1 score was calculated on all the available data with a 5-fold cross-validation.

Table S1: All data (queried labels and F1 scores) computed for the S-M dataset with the AL procedure and compared with supervised ML (5-fold cross-validated).

| Model                               | Stop set size | 10 QPI - SP $\geq$ 0.99 |                   | 50 QPI - SP $\geq$ 0.99 |                   | Supervised ML F1 score |
|-------------------------------------|---------------|-------------------------|-------------------|-------------------------|-------------------|------------------------|
|                                     |               | # Labels                | F1 score          | # Labels                | F1 score          |                        |
| <b>Descriptor: PCA MFP</b>          |               |                         |                   |                         |                   |                        |
| Ada                                 | 15%           | 1942 $\pm$ 636          | 0.712 $\pm$ 0.014 | 3490 $\pm$ 378          | 0.705 $\pm$ 0.016 | 0.694 $\pm$ 0.008      |
|                                     | 30%           | 2324 $\pm$ 158          | 0.696 $\pm$ 0.010 | 2910 $\pm$ 120          | 0.698 $\pm$ 0.008 |                        |
| k-NN                                | 15%           | 1129 $\pm$ 258          | 0.648 $\pm$ 0.015 | 3445 $\pm$ 172          | 0.673 $\pm$ 0.018 | 0.652 $\pm$ 0.012      |
|                                     | 30%           | 1623 $\pm$ 373          | 0.639 $\pm$ 0.011 | 2930 $\pm$ 33           | 0.647 $\pm$ 0.011 |                        |
| RF                                  | 15%           | 2324 $\pm$ 158          | 0.696 $\pm$ 0.010 | 2910 $\pm$ 120          | 0.698 $\pm$ 0.008 | 0.802 $\pm$ 0.007      |
|                                     | 30%           | 2900 $\pm$ 0            | 0.817 $\pm$ 0.011 | 2950 $\pm$ 0            | 0.815 $\pm$ 0.012 |                        |
| SVC                                 | 15%           | 867 $\pm$ 365           | 0.728 $\pm$ 0.027 | 1765 $\pm$ 153          | 0.747 $\pm$ 0.019 | 0.722 $\pm$ 0.007      |
|                                     | 30%           | 1010 $\pm$ 131          | 0.731 $\pm$ 0.012 | 1670 $\pm$ 65           | 0.734 $\pm$ 0.011 |                        |
| <b>Descriptor: One-hot encoder</b>  |               |                         |                   |                         |                   |                        |
| Ada                                 | 15%           | 1659 $\pm$ 401          | 0.713 $\pm$ 0.019 | 3115 $\pm$ 457          | 0.702 $\pm$ 0.012 | 0.690 $\pm$ 0.016      |
|                                     | 30%           | 1828 $\pm$ 199          | 0.701 $\pm$ 0.011 | 2840 $\pm$ 182          | 0.697 $\pm$ 0.010 |                        |
| k-NN                                | 15%           | 1252 $\pm$ 304          | 0.717 $\pm$ 0.028 | 3615 $\pm$ 70           | 0.691 $\pm$ 0.014 | 0.655 $\pm$ 0.011      |
|                                     | 30%           | 1605 $\pm$ 259          | 0.726 $\pm$ 0.016 | 2950 $\pm$ 0            | 0.674 $\pm$ 0.018 |                        |
| RF                                  | 15%           | 3300 $\pm$ 0            | 0.840 $\pm$ 0.012 | 3650 $\pm$ 0            | 0.839 $\pm$ 0.015 | 0.826 $\pm$ 0.010      |
|                                     | 30%           | 2910 $\pm$ 0            | 0.829 $\pm$ 0.006 | 2950 $\pm$ 0            | 0.830 $\pm$ 0.007 |                        |
| SVC                                 | 15%           | 948 $\pm$ 252           | 0.786 $\pm$ 0.018 | 2110 $\pm$ 94           | 0.822 $\pm$ 0.011 | 0.816 $\pm$ 0.009      |
|                                     | 30%           | 1375 $\pm$ 225          | 0.805 $\pm$ 0.011 | 1795 $\pm$ 82           | 0.810 $\pm$ 0.006 |                        |
| <b>Descriptor: Reduced 1D RDKit</b> |               |                         |                   |                         |                   |                        |
| Ada                                 | 15%           | 1915 $\pm$ 603          | 0.708 $\pm$ 0.010 | 3475 $\pm$ 242          | 0.705 $\pm$ 0.015 | 0.697 $\pm$ 0.007      |
|                                     | 30%           | 2167 $\pm$ 285          | 0.699 $\pm$ 0.007 | 2940 $\pm$ 30           | 0.698 $\pm$ 0.009 |                        |
| k-NN                                | 15%           | 632 $\pm$ 205           | 0.680 $\pm$ 0.016 | 2530 $\pm$ 180          | 0.738 $\pm$ 0.009 | 0.716 $\pm$ 0.006      |
|                                     | 30%           | 849 $\pm$ 172           | 0.680 $\pm$ 0.016 | 2530 $\pm$ 180          | 0.738 $\pm$ 0.009 |                        |
| RF                                  | 15%           | 3650 $\pm$ 0            | 0.827 $\pm$ 0.011 | 3650 $\pm$ 0            | 0.828 $\pm$ 0.011 | 0.817 $\pm$ 0.008      |
|                                     | 30%           | 2950 $\pm$ 0            | 0.821 $\pm$ 0.009 | 2950 $\pm$ 0            | 0.822 $\pm$ 0.011 |                        |
| SVC                                 | 15%           | 858 $\pm$ 277           | 0.750 $\pm$ 0.017 | 2190 $\pm$ 91           | 0.778 $\pm$ 0.017 | 0.753 $\pm$ 0.012      |
|                                     | 30%           | 1184 $\pm$ 146          | 0.762 $\pm$ 0.012 | 1870 $\pm$ 74           | 0.778 $\pm$ 0.017 |                        |

### 3 Reduced 2D descriptors from RDKit

All the 2D descriptors from RDKit were reduced (about 1600 descriptors) using a LinearSVC from the SKlearn python library to retain 190 and 144 features for the B-H (Table S2) and S-M dataset (Table S3), respectively.

Table S2: All the 190 RDKit 2D descriptors retained for the B-H dataset. The descriptors are presented for each reaction component.

| Catalyst | Base   | Aryl halide |             | Additive |            | Product |        |
|----------|--------|-------------|-------------|----------|------------|---------|--------|
| ATSC6dv  | ATS4m  | ATS0Z       | ATS4i       | ATS2dv   | ATS0i      | ATS2Z   | ATS7v  |
| ATSC6Z   | ATS0i  | ATS1Z       | ATS5i       | ATS3dv   | ATS1i      | ATS3Z   | ATS8v  |
| ATSC8Z   | ATSC6m | ATS2Z       | ATS6i       | ATS4dv   | ATS2i      | ATS4Z   | ATS0i  |
| ATSC3m   | ATSC7m | ATS3Z       | ATS7i       | ATS5dv   | ATS3i      | ATS8Z   | ATS1i  |
| ATSC4m   | ATSC3v | ATS4Z       | AATS0m      | ATS4s    | ATS4i      | ATS0m   | ATS2i  |
| ATSC5m   | ATSC4v | ATS5Z       | ATSC0Z      | ATS5s    | ATS5i      | ATS1m   | ATS4i  |
| ATSC6m   | ATSC6v | ATS6Z       | ATSC3Z      | ATS2Z    | ATS6i      | ATS2m   | ATS5i  |
| ATSC7m   | ATSC7v | ATS7Z       | ATSC4Z      | ATS3Z    | ATS7i      | ATS3m   | ATS6i  |
| ATSC8m   |        | ATS0m       | ATSC5Z      | ATS4Z    | ATS8i      | ATS4m   | ATS7i  |
| ATSC3v   |        | ATS1m       | ATSC6Z      | ATS5Z    | AATS4m     | ATS5m   | ATSC0m |
| ATSC4v   |        | ATS2m       | ATSC7Z      | ATS6Z    | AATS4v     | ATS6m   | ATSC3m |
| ATSC5v   |        | ATS3m       | ATSC0m      | ATS8Z    | AATS3i     | ATS7m   | ATSC6m |
| ATSC6v   |        | ATS4m       | ATSC2m      | ATS0m    | ATSC2dv    | ATS8m   | ATSC8m |
| ATSC7v   |        | ATS5m       | ATSC3m      | ATS1m    | ATSC2Z     | ATS0v   | ATSC2v |
| ATSC8v   |        | ATS6m       | ATSC4m      | ATS2m    | ATSC0m     | ATS1v   | ATSC3v |
| MPC10    |        | ATS7m       | ATSC5m      | ATS3m    | ATSC2m     | ATS2v   | ATSC4v |
| TMPC10   |        | ATS0v       | ATSC6m      | ATS4m    | ATSC3m     | ATS3v   | ATSC5v |
|          |        | ATS1v       | ATSC7m      | ATS5m    | ATSC4m     | ATS4v   | ATSC7v |
|          |        | ATS2v       | ATSC0v      | ATS6m    | ATSC5m     | ATS5v   | ATSC8v |
|          |        | ATS3v       | ATSC2v      | ATS7m    | ATSC6m     | ATS6v   |        |
|          |        | ATS4v       | ATSC3v      | ATS8m    | ATSC8m     |         |        |
|          |        | ATS5v       | ATSC5v      | ATS0v    | ATSC0v     |         |        |
|          |        | ATS7v       | ATSC7v      | ATS1v    | ATSC2v     |         |        |
|          |        | ATS0i       | AATSC5m     | ATS2v    | ATSC3v     |         |        |
|          |        | ATS1i       | PEOE_VSA9   | ATS3v    | ATSC4v     |         |        |
|          |        | ATS2i       | EState_VSA4 | ATS4v    | ATSC5v     |         |        |
|          |        | ATS3i       | EState_VSA8 | ATS5v    | ATSC6v     |         |        |
|          |        |             |             | ATS6v    | ATSC7v     |         |        |
|          |        |             |             | ATS7v    | ATSC8v     |         |        |
|          |        |             |             | ATS8v    | ATSC2i     |         |        |
|          |        |             |             | ATS4se   | ATSC4i     |         |        |
|          |        |             |             | ATS5se   | AATSC4m    |         |        |
|          |        |             |             | ATS4pe   | BertzCT    |         |        |
|          |        |             |             | ATS5pe   | PEOE_VSA10 |         |        |
|          |        |             |             | ATS4are  | PEOE_VSA11 |         |        |
|          |        |             |             | ATS5are  | TopoPSA    |         |        |

Table S3: All the 144 RDKit 2D descriptors retained for the S-M dataset. The descriptors are presented for each reaction component.

| <b>Catalyst</b> | <b>Base</b> | <b>Aryl halide</b> |         | <b>Additive</b> |         | <b>Product</b> |        |
|-----------------|-------------|--------------------|---------|-----------------|---------|----------------|--------|
| ATS0m           | ATS0m       | ATS8dv             | AATS5v  | ATS0Z           | ATS6v   | ATS0Z          | ATS0i  |
| ATS0v           | ATS1m       | ATS0Z              | AATS6v  | ATS2Z           | ATS0i   | ATS1Z          | ATS1i  |
| ATS1v           | ATS2m       | ATS1Z              | ATSC4Z  | ATS3Z           | ATS1i   | ATS2Z          | ATS2i  |
| ATS2v           | ATS1v       | ATS2Z              | ATSC1m  | ATS4Z           | ATS2i   | ATS3Z          | ATS3i  |
| ATS3v           | ATS3v       | ATS3Z              | ATSC2m  | ATS5Z           | ATS3i   | ATS4Z          | ATS4i  |
| ATS4v           | ATS4v       | ATS4Z              | ATSC3m  | ATS6Z           | ATS4i   | ATS5Z          | ATS6i  |
| ATS0i           | ATS0i       | ATS5Z              | ATSC4m  | ATS0m           | ATS5i   | ATS0m          | ATSC0m |
| ATS3i           | ATS1i       | ATS7Z              | ATSC5m  | ATS1m           | ATS6i   | ATS1m          | ATSC3m |
| ATS4i           | ATS3i       | ATS8Z              | ATSC6m  | ATS2m           | ATS7i   | ATS2m          | ATSC4m |
| ATSC2m          | ATS4i       | ATS0m              | ATSC7m  | ATS3m           | ATSC0Z  | ATS3m          | ATSC5m |
| ATSC3m          | ATS5i       | ATS1m              | ATSC8m  | ATS4m           | ATSC3Z  | ATS4m          | ATSC7m |
| ATSC2v          | AATS0m      | ATS2m              | ATSC1v  | ATS5m           | ATSC0m  | ATS5m          | ATSC0v |
|                 | ATSC2v      | ATS3m              | ATSC2v  | ATS6m           | ATSC2m  | ATS8m          | ATSC5v |
|                 | ATSC3v      | ATS4m              | ATSC3v  | ATS0v           | ATSC3m  | ATS0v          | ATSC7v |
|                 |             | ATS5m              | ATSC4v  | ATS1v           | ATSC4m  | ATS1v          | ATSC8v |
|                 |             | ATS7m              | ATSC5v  | ATS2v           | ATSC5m  | ATS0p          | ATSC0p |
|                 |             | ATS8m              | ATSC6v  | ATS3v           | ATSC7m  |                |        |
|                 |             | ATS8v              | ATSC7v  | ATS4v           | ATSC0v  |                |        |
|                 |             | ATS6pe             | ATSC8v  | ATS5v           | AATSC7m |                |        |
|                 |             | ATS7pe             | BertzCT |                 |         |                |        |
|                 |             | ATS6are            | fragCpx |                 |         |                |        |
|                 | ATS7are     | MPC10              |         |                 |         |                |        |
|                 | ATS8are     | TMPC10             |         |                 |         |                |        |
|                 | AATS4v      |                    |         |                 |         |                |        |

## 4 Global Scores for One-hot encoder and Reduced RDKit 2D descriptors

In Figure S1 and Figure S2 are shown the Global Scores (GS) for each dataset (B-H and S-M) and for the One-hot encoder and the reduced RDKit 2D descriptors, respectively.

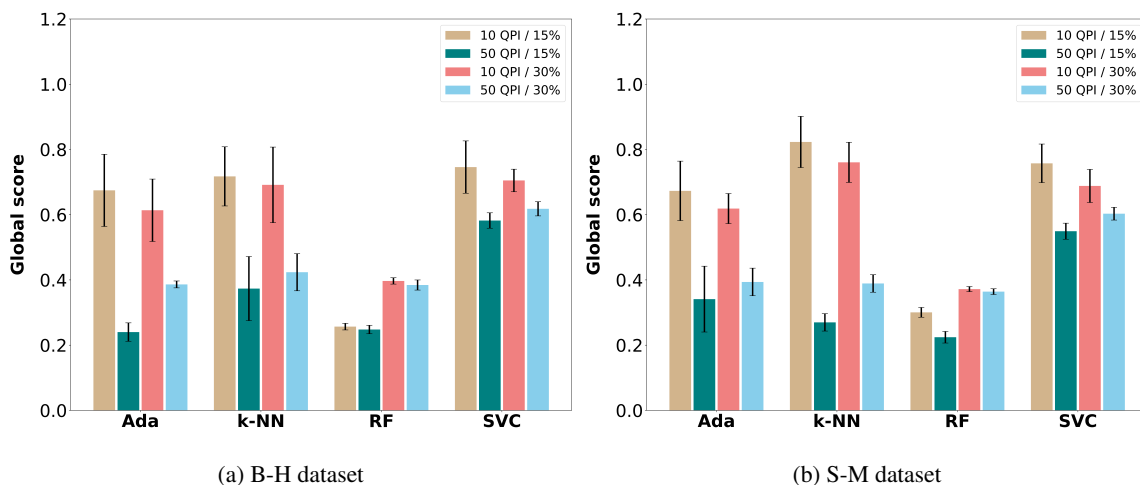

Figure S1: Global score (GS) for each model with each combination of QPI and stop set size using the one-hot encoder descriptor for the B-H (left) and S-M (right) dataset, respectively. The bar shows the standard deviations of 10 runs.

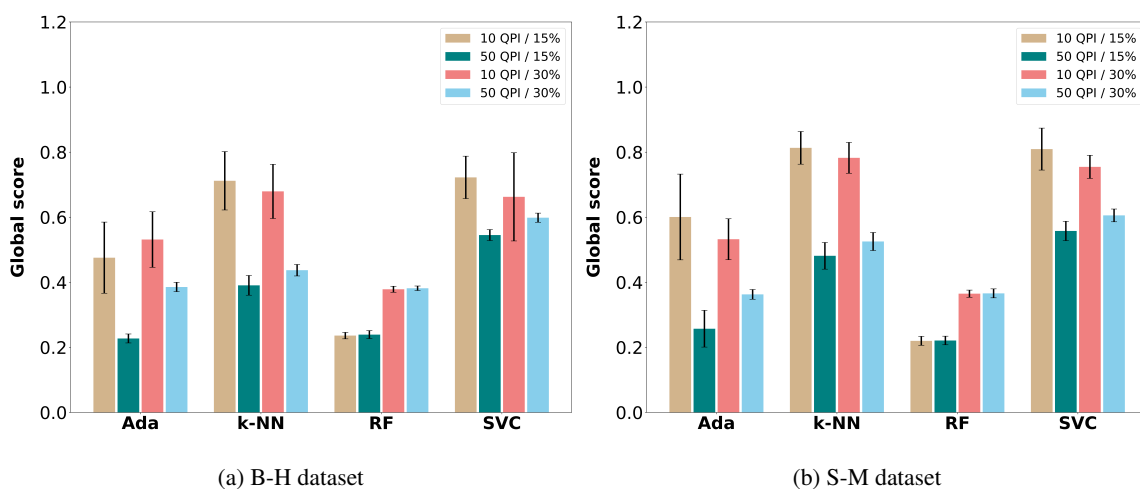

Figure S2: Global score (GS) for each model with each combination of QPI and stop set size using the reduced RDKit 2D descriptors for the B-H (left) and S-M (right) dataset, respectively. The bar shows the standard deviations of 10 runs.

## 5 Simplified AL loop algorithm

In Figure S3 is represented a simplified pseudo-algorithm to perform Active Learning (AL).

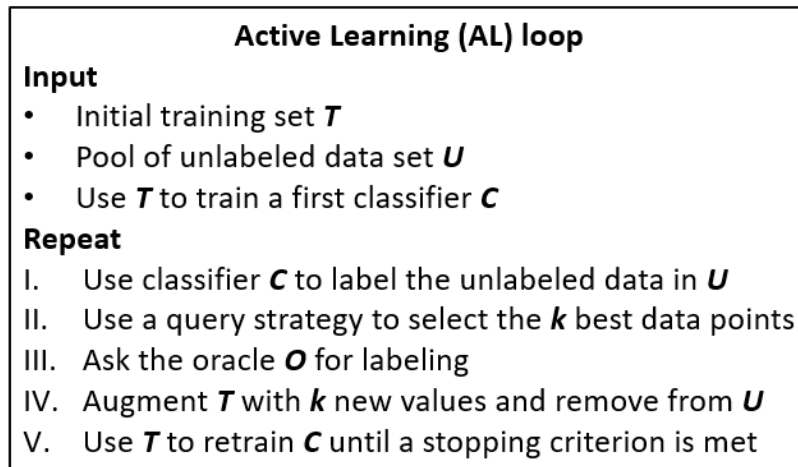

Figure S3: Simplified algorithm of the AL loop
